# Supplementary material for: Effects of the Fungal Endophyte Epichloë festucae var. lolii on Growth and Physiological Responses of Perennial Ryegrass cv. Fairway to Combined Drought and Pathogen Stresses
Source: MDPI journal article supplement (doi:10.3390/microorganisms8121917), 2020-12-02
Supplement: s1 [file s1]

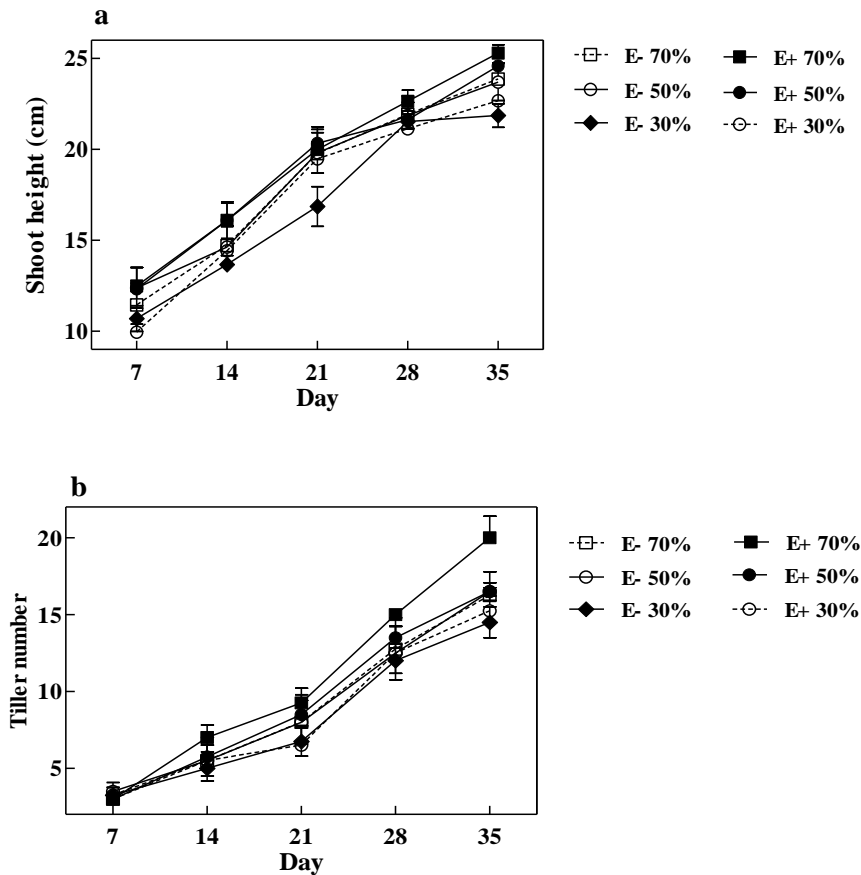

**Supplementary Figure S1.** Shoot height (a) and tiller number (b) of perennial ryegrass infected with (E+) or without (E-) fungal endophyte at 70%, 50%, and 30% soil water regime before inoculated by *B. sorokiniana*. Mean  $\pm$  SEM of four replicates.

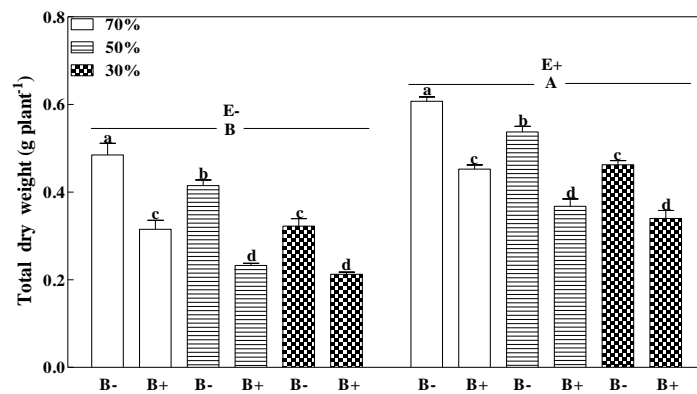

**Supplementary Figure S2.** Total dry weight of perennial ryegrass infected with (E+) or without (E-) fungal endophyte and inoculated (B+) or non-inoculated (B-) with pathogen at 70%, 50%, and 30% soil water regime at harvest. Mean  $\pm$  SEM of four replicates are shown. Bars topped by the same lowercase letter indicate no significant difference between soil water regimes and pathogen within fungal endophyte treatments at  $P \leq 0.05$  by Tukey's HSD test. Bars topped by the same uppercase letter indicate no significant difference associated with fungal endophyte at  $P \leq 0.05$  by Tukey's HSD test.

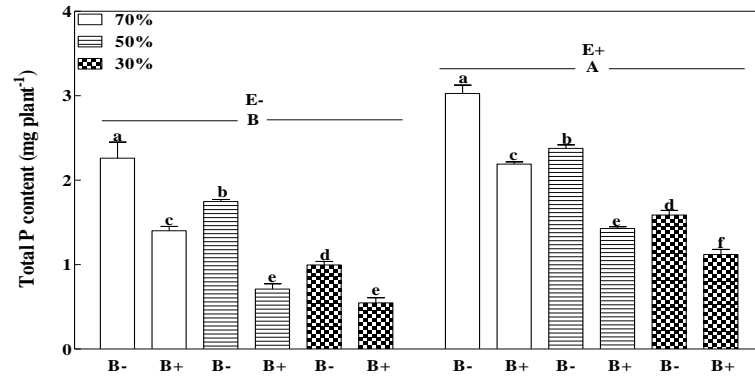

**Supplementary Figure S3.** Total P content of perennial ryegrass infected with (E+) or without (E-) fungal endophyte and inoculated (B+) or non-inoculated (B-) with pathogen at 70%, 50%, and 30% soil water regime at harvest. Mean  $\pm$  SEM of four replicates are shown. Bars topped by the same lowercase letter indicate no significant difference between soil water regimes and pathogen within fungal endophyte treatments at  $P \leq 0.05$  by Tukey's HSD test. Bars topped by the same uppercase letter indicate no significant difference associated with fungal endophyte at  $P \leq 0.05$  by Tukey's HSD test.
